# Supplementary material
Source: bioRxiv or medRxiv preprint supplement (https://www.biorxiv.org/highwire/filestream/118112/field_highwire_adjunct_files/0/389197-1.pdf)
Supplement: Supplementary file [file 389197-1.pdf]

**S1 Table: BUSCO analysis of the Chardonnay FALCON Unzip assembly before and after curation.**

|                             |                                 | Primary Contigs |       | Haplotigs |       | Primary contigs + Haplotigs |       |
|-----------------------------|---------------------------------|-----------------|-------|-----------|-------|-----------------------------|-------|
|                             |                                 | #               | %     | #         | %     | #                           | %     |
| Total BUSCO groups searched |                                 | 1440            | 100   | 1440      | 100   | 1440                        | 100   |
| FALCON Unzip                | Complete BUSCOs                 | 1277            | 88.68 | 1002      | 69.58 | 1348                        | 93.61 |
|                             | Complete and single-copy BUSCOs | 1177            | 81.74 | 959       | 66.60 | 691                         | 47.99 |
|                             | Complete and duplicated BUSCOs  | 100             | 6.94  | 43        | 2.99  | 657                         | 45.63 |
|                             | Fragmented BUSCOs               | 31              | 2.15  | 56        | 3.89  | 21                          | 1.46  |
|                             | Missing BUSCOs                  | 132             | 9.17  | 382       | 26.53 | 71                          | 4.93  |
| Curated                     | Complete BUSCOs                 | 1290            | 89.58 | 1093      | 75.90 | 1347                        | 93.54 |
|                             | Complete and single-copy BUSCOs | 1230            | 85.42 | 1060      | 73.61 | 690                         | 47.92 |
|                             | Complete and duplicated BUSCOs  | 60              | 4.17  | 33        | 2.29  | 657                         | 45.63 |
|                             | Fragmented BUSCOs               | 43              | 2.99  | 58        | 4.03  | 23                          | 1.60  |
|                             | Missing BUSCOs                  | 107             | 7.43  | 289       | 20.07 | 70                          | 4.86  |
